# Supplementary material for: Glutathione-responsive nanoparticles based on a sodium alginate derivative for selective release of doxorubicin in tumor cells
Source: Royal Society of Chemistry journal article supplement (doi:10.1039/c6tb03032g), 2017-01-01
Supplement: c6tb03032g1.pdf [file c6tb03032g1.pdf]

## Supplementary information

### Glutathione-responsive nanoparticles from a sodium alginate derivative for selective release of doxorubicin in tumor cells

Cheng Gao,<sup>a</sup> Fan Tang,<sup>a</sup> Jianxiang Zhang,<sup>b</sup> Simon M.Y. Lee<sup>a,\*</sup> and Ruibing Wang<sup>a,\*</sup>

<sup>a</sup> State Key Laboratory of Quality Research in Chinese Medicine, Institute of Chinese Medical Sciences, University of Macau, Taipa,

Macao, China. \*E-mail: rwang@umac.mo; simonlee@umac.mo; Tel: +853-8822-4689

<sup>b</sup> Department of Pharmaceutics, College of Pharmacy, Third Military Medical University, Chongqing 400038, China.

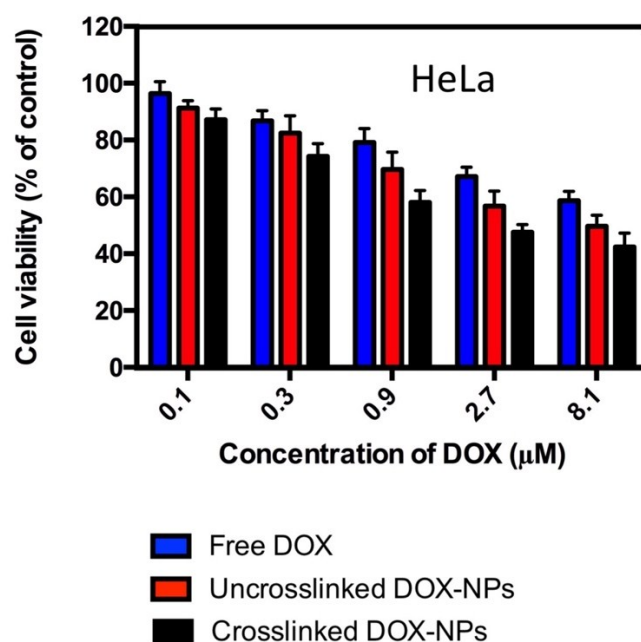

**Figure S1.** Cytotoxicity evaluation of free DOX, uncrosslinked DOX-NPs and crosslinked DOX-NPs that were incubated for 24 h with HeLa cells.

**Table S1.** The mean size (diameter) and size distribution of crosslinked nanoparticles incubated with the cell culture media at different time points.

| Time (h) | Diameter (nm) | PDI   | Zeta potential (mV) |
|----------|---------------|-------|---------------------|
| 0        | 106.6         | 0.204 | -18.3               |
| 6        | 113.4         | 0.226 | -17.3               |
| 12       | 125.5         | 0.267 | -15.4               |
| 24       | 139.2         | 0.292 | -13.6               |

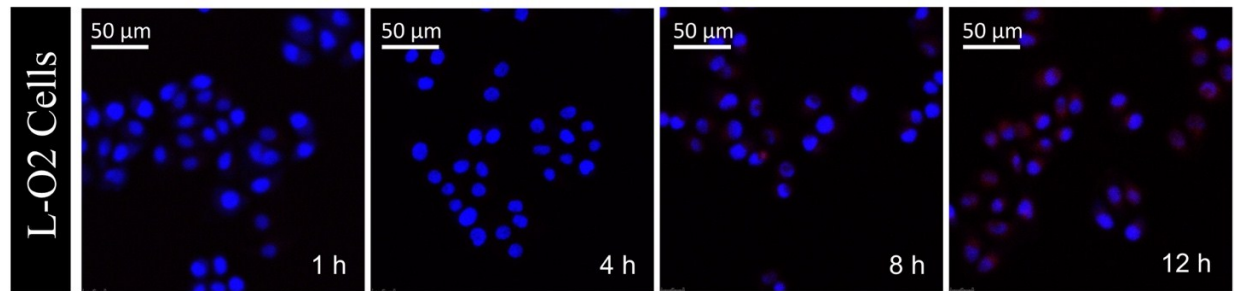

**Figure S2.** Cellular uptake behavior of crosslinked DOX-NPs in L-O2 cells (incubation for up to 12 h).

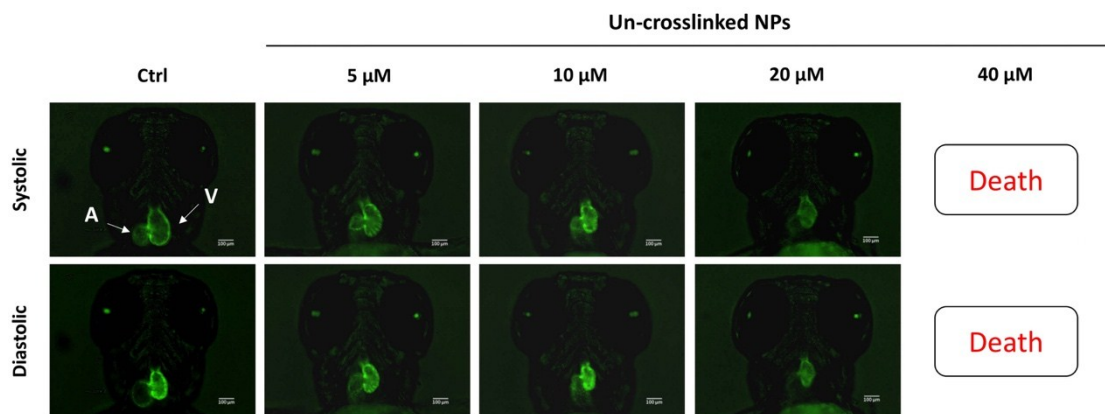

**Figure S3.** Representative fluorescent images of zebrafish exposed to various concentrations of un-crosslinked DOX-NPs for 2 days. “A” denotes atrium, and “V” denotes ventricle.

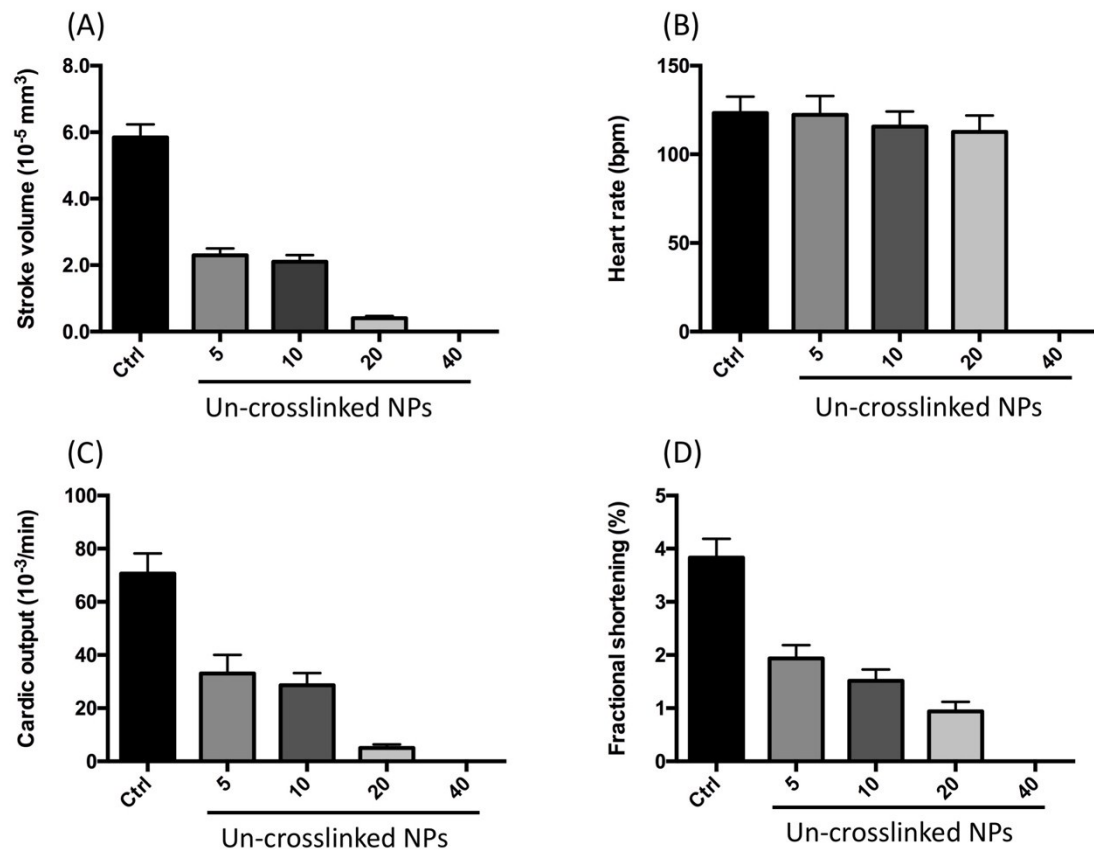

**Figure S4.** Cardiac functions of zebrafish exposed to various concentrations of un-crosslinked NPs for 2 days; (A) Stroke volume, (B) Heart rate, (C) Cardiac output and (D) FS % Data are presented as mean  $\pm$  S.D. (n =16).
